# Supplementary material for: Biocatalytic CO2 Absorption and Structural Studies of Carbonic Anhydrase under Industrially-Relevant Conditions
Source: Int J Mol Sci. 2020 Apr 22;21(8):2918. doi: 10.3390/ijms21082918 (PMC7215295; doi:10.3390/ijms21082918)
Supplement: Supplementary file 1 [file ijms-21-02918-s001.pdf]

## Supplementary material

### **Biocatalytic CO<sub>2</sub> absorption and structural studies of carbonic anhydrase under industrially-relevant conditions**

**Aline M. de Castro<sup>1,2,\*</sup>, Elisabete Ferreira<sup>3</sup>, Carla Portugal<sup>1</sup>, Luisa A. Neves<sup>1</sup> and João G. Crespo<sup>1,\*</sup>**

<sup>1</sup> LAQV, REQUIMTE, Departamento de Química, Faculdade de Ciências e Tecnologia, Universidade NOVA de Lisboa, 2829-516, Caparica, Portugal

<sup>2</sup> Biotechnology Division, Research and Development Center, PETROBRAS, Av. Horácio Macedo, 950. Ilha do Fundão, Rio de Janeiro, 21941-915, Brazil.

<sup>3</sup> UCIBIO, REQUIMTE, Faculdade de Ciências e Tecnologia, Universidade NOVA de Lisboa, Campus de Caparica, 2829-516, Caparica, Portugal

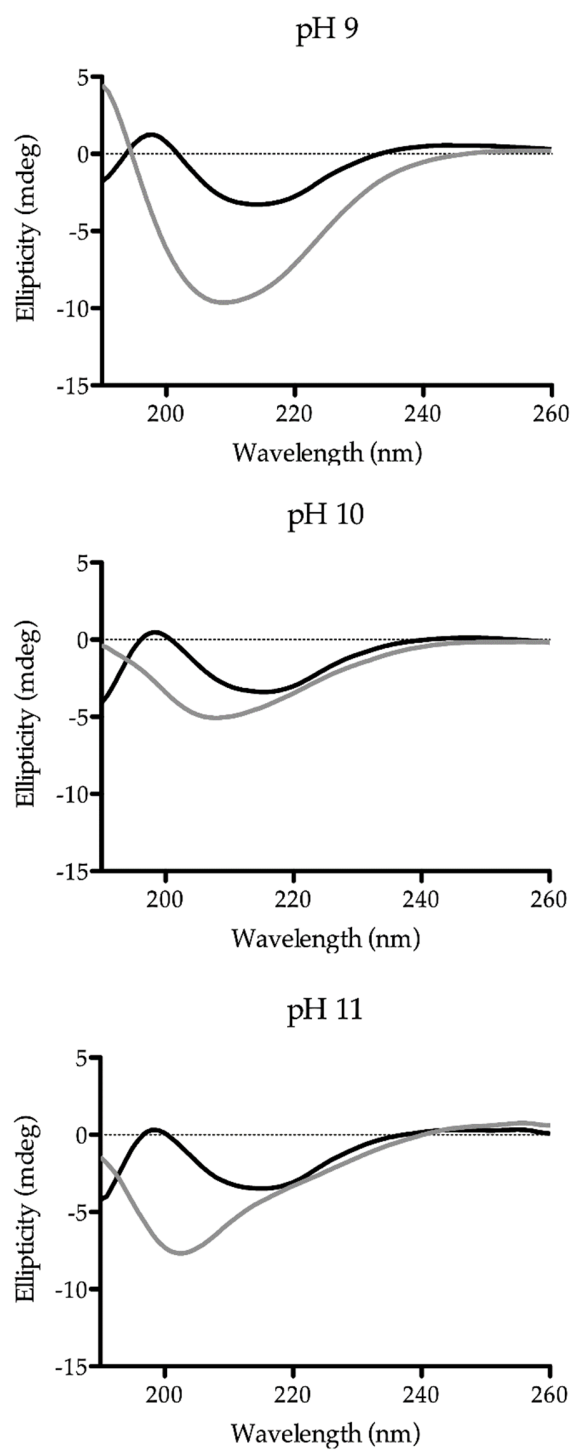

**Figure S1:** CD spectra of BCA at 20°C before (black) and after (grey) a temperature ramp (20-94 °C) under different pH conditions in mineral water.

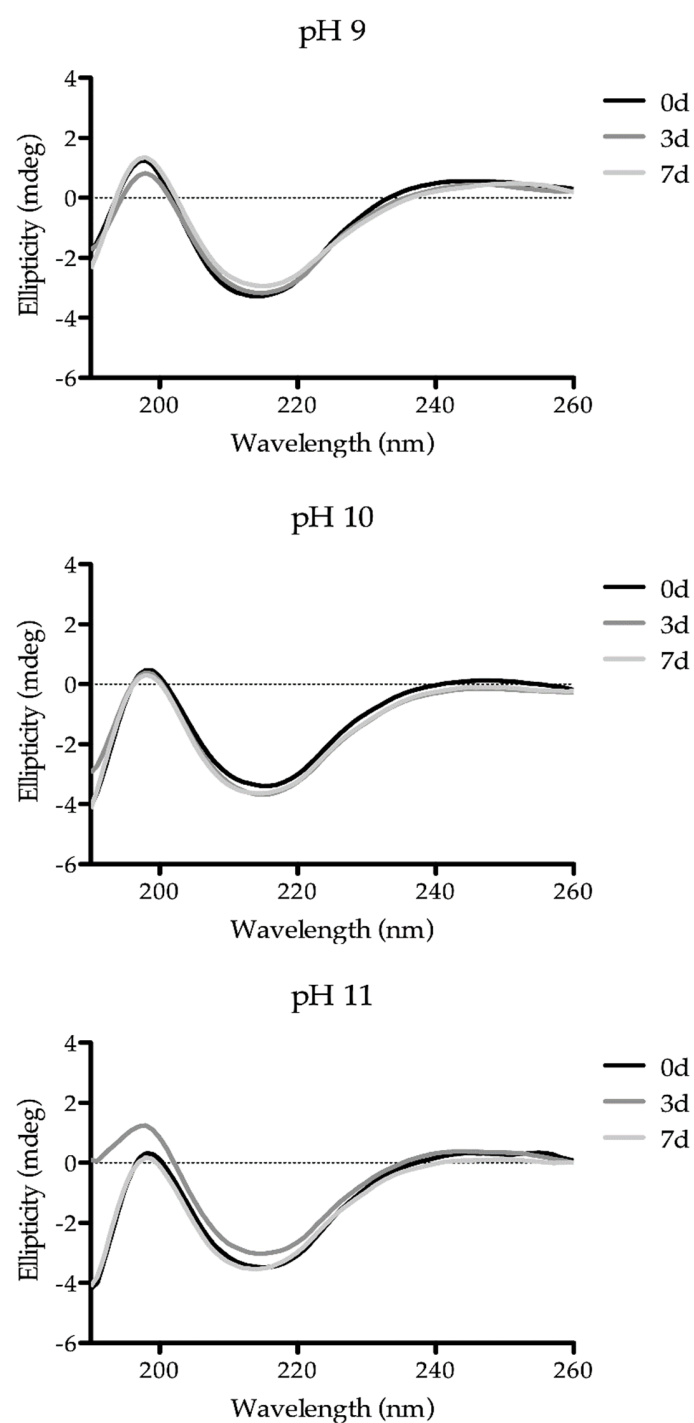

**Figure S2:** CD spectra of BCA during incubation at 30 °C under different pH conditions in mineral water.

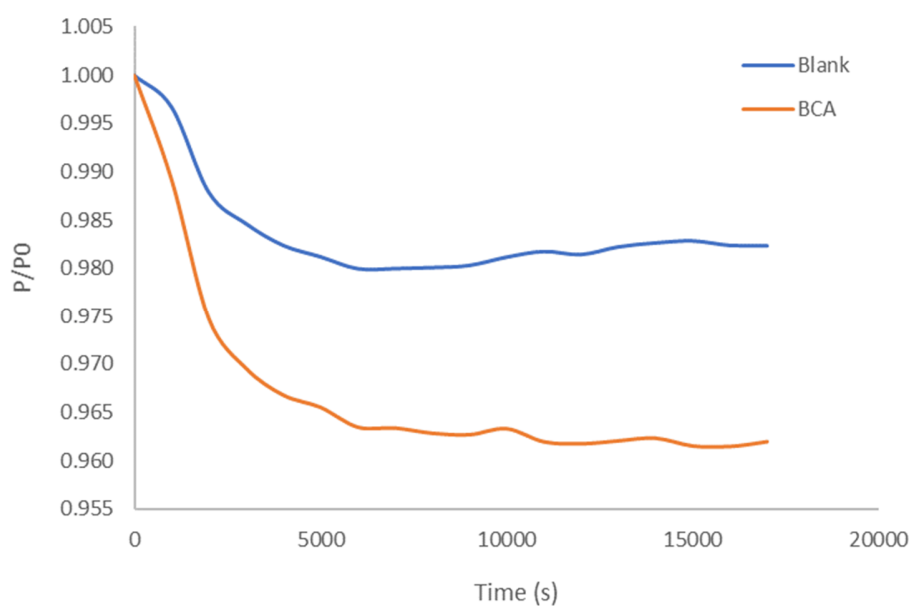

**Figure S3:** Time courses of pressure decay (normalized to the initial pressure –  $P_0$ ) as a function of time, during  $\text{CO}_2$  sorption tests under pH 10. Raw data are plotted after using a smoothing tool, to minimize noise.

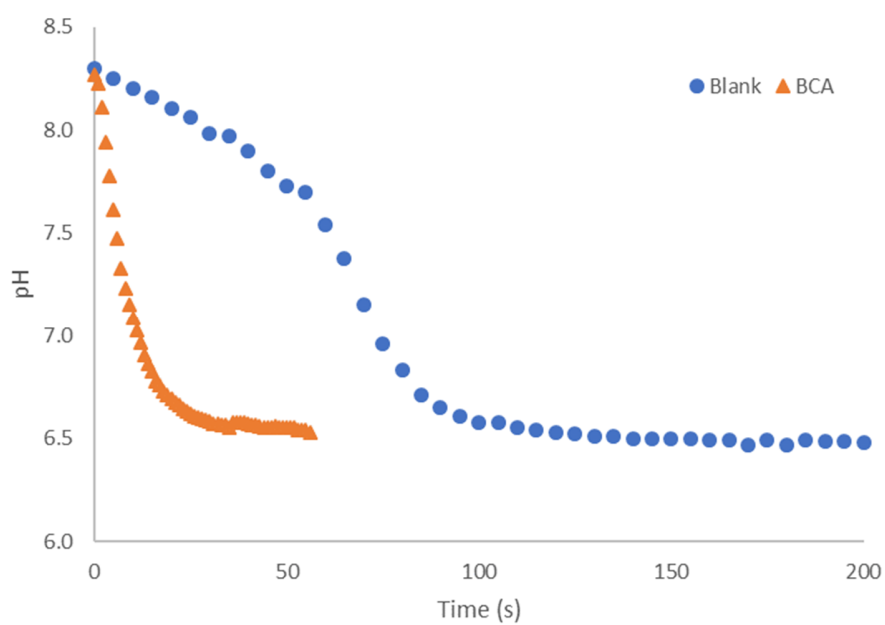

**Figure S4:** Time courses of pH decrease during determination of the enzymatic activity of BCA, according to Wilbur-Anderson method [1].

## Reference

1. Wilbur, K.M.; Anderson, N.G. Electrometric and colorimetric determination of carbonic anhydrase. *J. Biol. Chem*, **1948**, 176, 147-154.
